# Supplementary material for: Enhancement of lithium transport by controlling the mesoporosity of silica monoliths filled by ionic liquids
Source: Royal Society of Chemistry journal article supplement (doi:10.1039/c5nj03318g), 2016-01-01
Supplement: c5nj03318g1.pdf [file c5nj03318g1.pdf]

## Supplementary information

to

### MS : “Enhancement of Lithium Transport by Controlling the Mesoporosity of Silica Monoliths filled by Ionic Liquids”

A. Guyomard-Lack, B. Said, N. Dupré, A. Galarneau, J. Le Bideau

S.I. 1

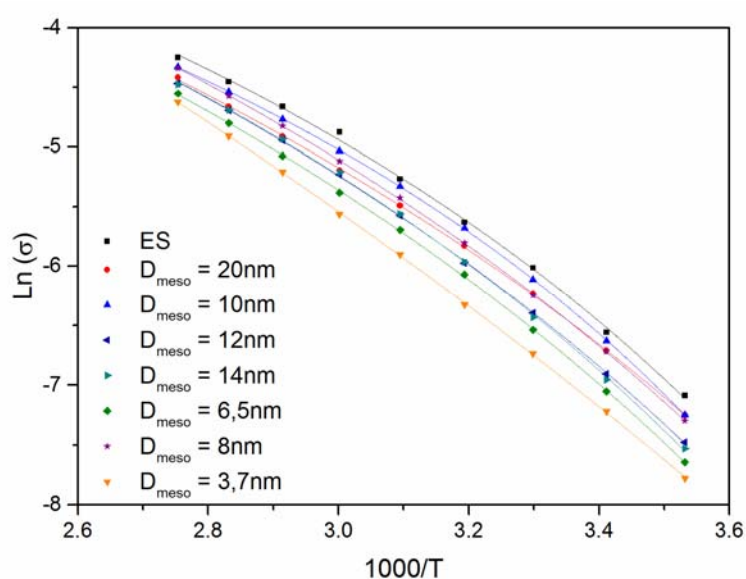

S.I. 1 VTF fittings of the conductivity for neat ES and confined in different silica monoliths.

### S.I. 2 : DSC measurements

Before DSC measurements (Q20 calorimeter, TA Instrument), samples were dried at 50°C under vacuum for 24h and sealed in hermetic aluminium pans. Samples were then quenched to -150°C at 20 °C.min<sup>-1</sup> and heated from -150 to +100°C at 10 °C.min<sup>-1</sup> after having reached thermal equilibrium. Data were analysed with TA Universal Analysis software.

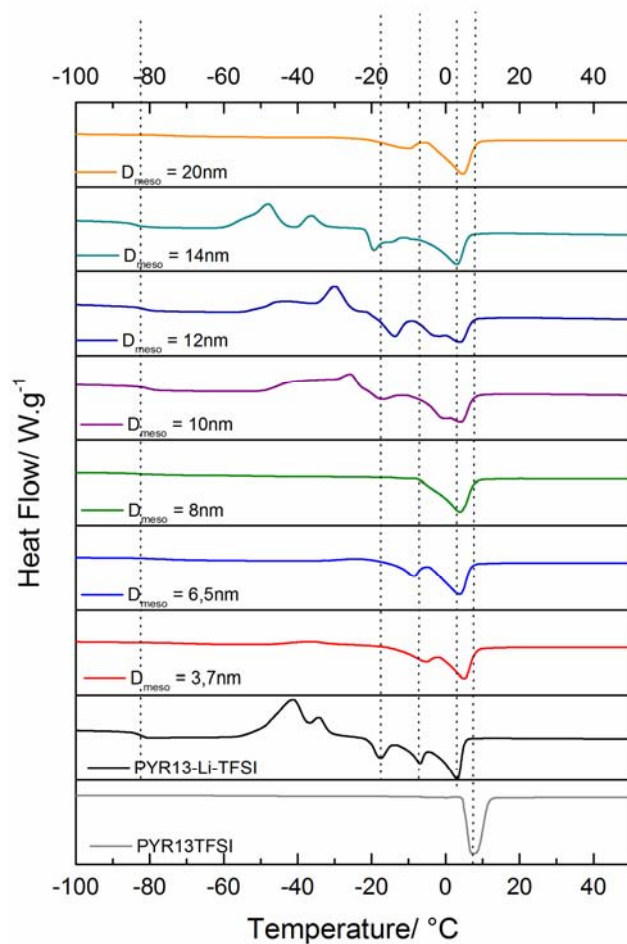

S.I. 2 DSC of Pyr13 TFSI, neat ES and confined in different silica monoliths.
